# Supplementary material for: Body mass index and waist circumference combined predicts obesity-related hypertension better than either alone in a rural Chinese population
Source: PubMed Central journal article supplement (PMC4992958; doi:10.1038/srep31935), 2016-08-22
Supplement: srep31935-s1.pdf [file srep31935-s1.pdf]

## **Title:**

Body mass index and waist circumference combined predicts obesity-related hypertension better than either alone in a rural Chinese population

## **Authors:**

Ming Zhang, Yang Zhao, Guoan Wang, Hongyan Zhang, Yongcheng Ren,

Bingyuan Wang, Lu Zhang, Xiangyu Yang, Chengyi Han, Chao Pang,

Lei Yin, Jingzhi Zhao, Dongsheng Hu

### **Supplementary Table 1. Awareness, treatment, and control of hypertension in study population**

| <b>Variables</b>   | <b>Awareness</b> | <b>Treatment</b> | <b>Control</b> |
|--------------------|------------------|------------------|----------------|
| <b>Overall</b>     | 865 (48.5)       | 840 (47.1)       | 475 (26.6)     |
| <b>Gender</b>      |                  |                  |                |
| <b>Men</b>         | 350 (47.7)       | 323 (44.1)       | 180 (24.6)     |
| <b>Women</b>       | 515 (49.0)       | 517 (49.2)       | 295 (28.1)     |
| <b>Age (years)</b> |                  |                  |                |
| <b>18-39</b>       | 109 (39.2)       | 93 (33.5)        | 55 (19.8)      |
| <b>40-59</b>       | 503 (50.8)       | 494 (49.9)       | 304 (30.7)     |
| <b>&gt;60</b>      | 253 (49.0)       | 253 (49.0)       | 116 (22.5)     |

Data are number (percentage).
